# Supplementary material for: IRF4 deficiency vulnerates B-cell progeny for leukemogenesis via somatically acquired Jak3 mutations conferring IL-7 hypersensitivity
Source: PubMed Central journal article supplement (PMC9613660; doi:10.1038/s41418-022-01005-z), 2022-04-22
Supplement: 41418_2022_1005_MOESM6_ESM.pdf [file 41418_2022_1005_MOESM6_ESM.pdf]

Please complete the table below to indicate the contributions of all named authors to the figures.

Figure 1:

|  |
|--|
|  |
|--|

Figure 2:

|  |
|--|
|  |
|--|

Figure 3:

|  |
|--|
|  |
|--|

Figure 4:

|  |
|--|
|  |
|--|

Figure 5:

|  |
|--|
|  |
|--|

Figure 6:

|  |
|--|
|  |
|--|

Signed for and on behalf of the Author(s):



Print Name:

|  |
|--|
|  |
|--|

Date:

|  |
|--|
|  |
|--|
